# Supplementary material
Source: publisher site journal article supplement (https://www.spandidos-publications.com/5238/downloadSupplementary)

Figure S1. Expression of TRIM65 mRNA expression is decreased in the aorta after feeding with WD. Apolipoprotein E<sup>-/-</sup> mice were randomly divided into two groups and fed on ND or WD for 16 weeks. At the end of the experiment, the aortas of the mice were collected before TRIM65 mRNA expression was measured by reverse transcription-quantitative PCR. Data are presented as the mean  $\pm$  SEM (n=4); \*P<0.05, unpaired Student's t-test. ND, normal diet; WD, western diet; TRIM65, Tripartite motif-containing protein 65.

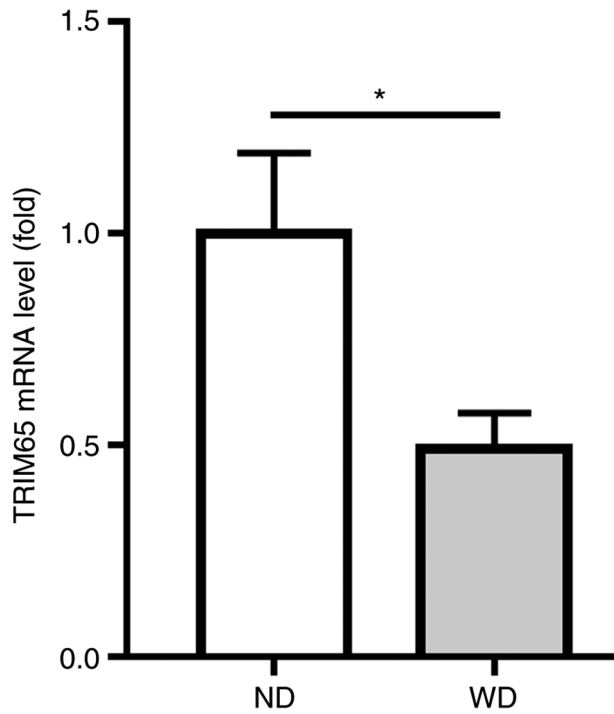

Supplement: Supplementary file 1 [file downloadSupplementary]
